# Supplementary material for: Fe3O4–MWCNT magnetic nanocomposites as efficient peroxidase mimic catalysts in a Fenton-like reaction for water purification without pH limitation
Source: Royal Society of Chemistry journal article supplement (doi:10.1039/c4ra07327d), 2014-09-04
Supplement: c4ra07327d1.pdf [file c4ra07327d1.pdf]

## Electronic Supplementary Information

Fe<sub>3</sub>O<sub>4</sub>-MWCNT magnetic nanocomposites as efficient peroxidase mimic catalysts in a Fenton-like reaction for water purification without pH limitation

**Hui Wang,<sup>a</sup> Huan Jiang,<sup>a</sup> Sha Wang,<sup>ab</sup> Wenbing Shi,<sup>c</sup> Jianchuan He,<sup>a</sup> Hong Liu,<sup>\*b</sup> Yuming Huang<sup>\*a</sup>**

*<sup>a</sup> Key Laboratory of Eco-environments in Three Gorges Reservoir Region, Ministry of Education, College of Chemistry and Chemical Engineering, Southwest University, Chongqing 400715, PR China.*

*<sup>b</sup> Chongqing Institute of Green and Intelligent Technology, Chinese Academy of Sciences, Chongqing 400714, PR China.*

*<sup>c</sup> Chongqing Key Laboratory of Inorganic Special Functional Materials; College of Chemistry and Chemical Engineering, Yangtze Normal University, Chongqing 408100, PR China*

## Supplemental Experimental

### 1. Electron spin resonance

220  $\mu\text{L}$  samples were prepared at room temperature by adding 50  $\mu\text{L}$  of 3%  $\text{H}_2\text{O}_2$ , 20  $\mu\text{L}$  of 0.2 M 5,5-Dimethyl-1-pyrroline *N*-oxide (DMPO) and 150  $\mu\text{L}$  of water into a 1 mL plastic tube in the presence of 40 mg  $\text{Fe}_3\text{O}_4$ -MWCNTs or  $\text{Fe}_3\text{O}_4$  MNPs, respectively. The prepared sample solution was transferred to a quartz capillary tube and placed in the ESR cavity. DMPO was used to trap the  $\cdot\text{OH}$  radicals to form the DMPO/ $\cdot\text{OH}$  spin adduct. The ESR spectra were obtained on a Bruker ESR E500 with microwave bridge (receiver gain, 60dB; modulation amplitude, 3 Gauss; microwave power, 10 mW; microwave frequency, 9.85 GHz; Sweep time, 40.96 s).

As can be seen from Figure S3, similar to ESR spin-trapping spectra of the  $\text{Fe}_3\text{O}_4$  MNPs, the ESR spectra in the presence of  $\text{Fe}_3\text{O}_4$ -MWCNTs displayed a 4-fold characteristic peak of the DMPO- $\cdot\text{OH}$  adduct with an intensity ratio of 1:2:2:1. The produced radicals attack MB molecules, resulting in decoloration.

### 2. Hydroxyl radical formation with terephthalic acid as a fluorescence probe

0.4 M  $\text{H}_2\text{O}_2$ , 0.6 mM terephthalic acid and different loadings of the  $\text{Fe}_3\text{O}_4$ -MWCNTs were first incubated at 25  $^\circ\text{C}$  for 12 h. The  $\text{Fe}_3\text{O}_4$ -MWCNTs were then removed from the reaction solution by an external magnetic field. The resulting solutions were used for fluorometric measurement.

Hydroxyl radical can react readily with terephthalic acid, forming highly fluorescent 2-hydroxy terephthalic acid<sup>1</sup> that can be identified from fluorescence spectrometer. As shown in new Figure S4, the fluorescence intensity was weak when there was no  $\text{Fe}_3\text{O}_4$ -MWCNTs. And the gradual increase of the fluorescence intensity was observed as the loading of the  $\text{Fe}_3\text{O}_4$ -MWCNTs increased, suggesting that the amount of the generated  $\cdot\text{OH}$  increased by the catalysis of

Fe<sub>3</sub>O<sub>4</sub>-MWCNTs.

### ***References***

1. K. Ishibashi, A. Fujishima, T. Watanabe and K. Hashimoto, *J. Photoch. Photobio. A*, 2000, **134**, 139–142.

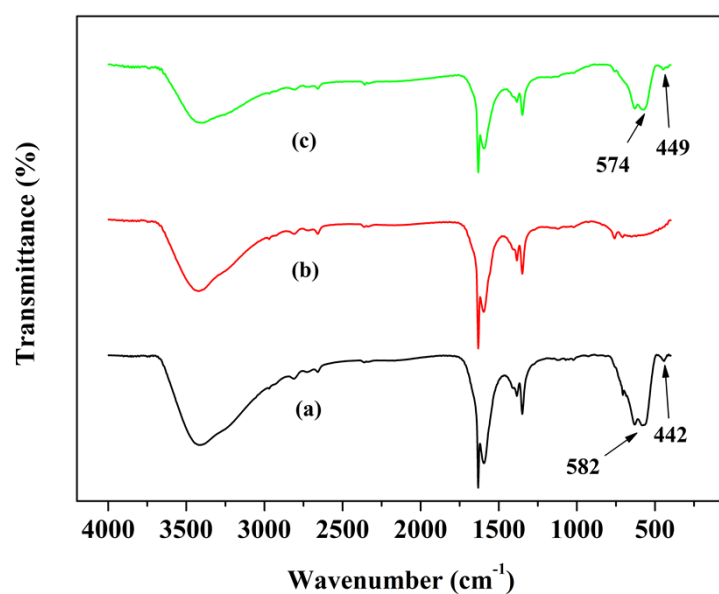

**Figure S1.** FT-IR spectra of  $\text{Fe}_3\text{O}_4$  (a), MWCNTs (b) and  $\text{Fe}_3\text{O}_4$ -MWCNTs.

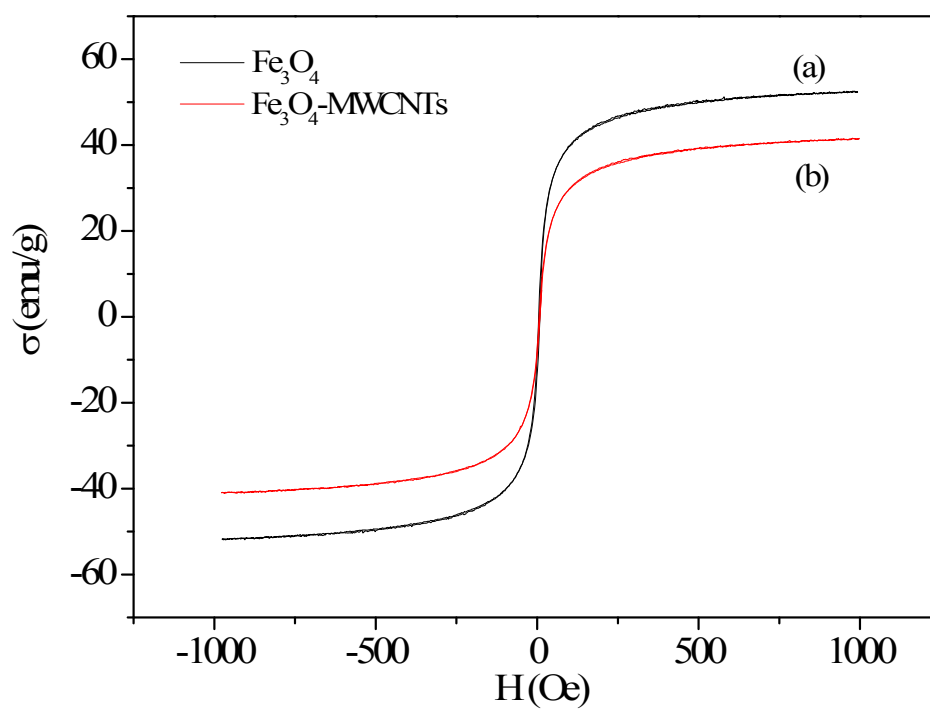

**Figure S2.** VSM magnetization curves of  $\text{Fe}_3\text{O}_4$  and  $\text{Fe}_3\text{O}_4$ -MWCNTs.

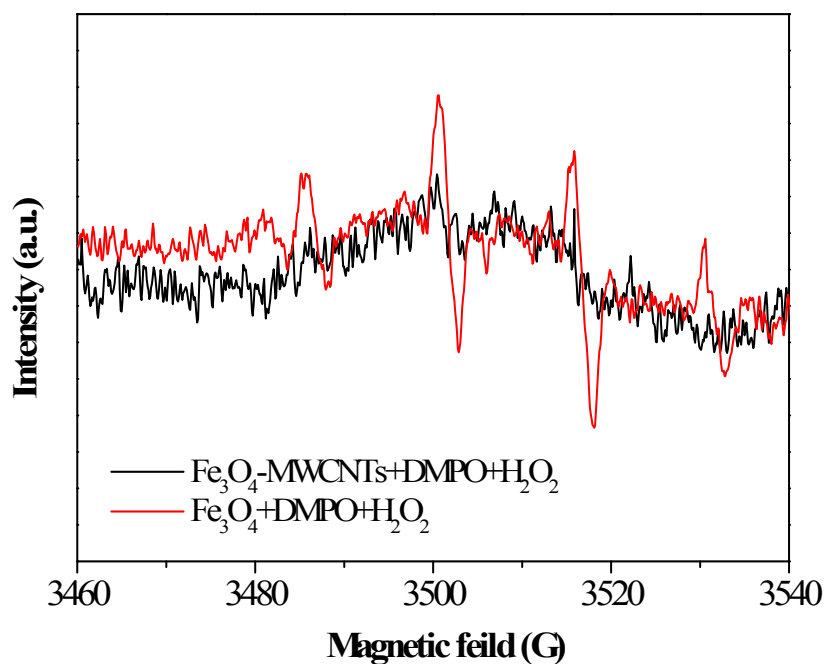

**Figure S3.** ESR spin-trapping spectra of  $\text{Fe}_3\text{O}_4\text{-MWCNTs}$  at  $0.4 \text{ mg mL}^{-1}$  (black) and  $\text{Fe}_3\text{O}_4$  at  $0.4 \text{ mg mL}^{-1}$  (red) in presence of  $\text{H}_2\text{O}_2$ .

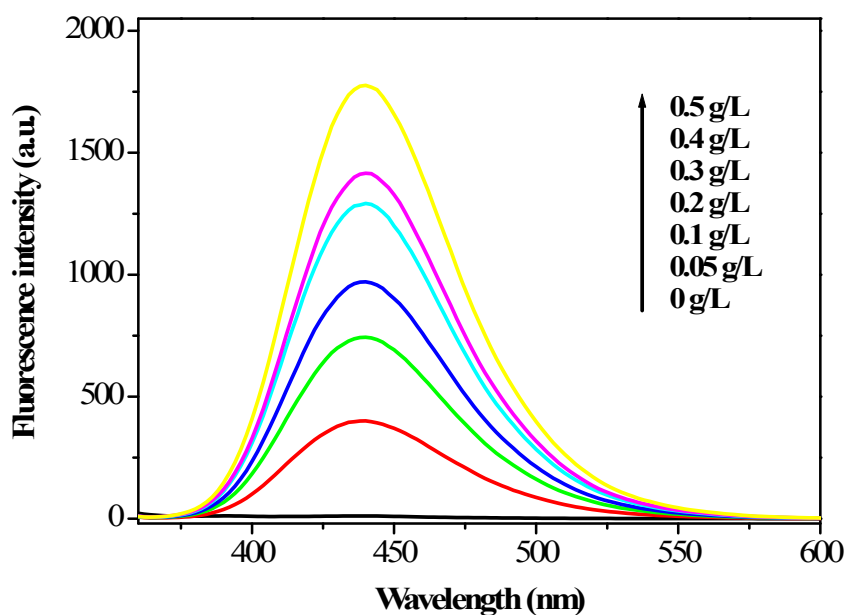

**Figure S4.** The effect of  $\text{Fe}_3\text{O}_4\text{-MWCNTs}$  loading (g/L) on the formation of hydroxyl radicals with terephthalic acid as a fluorescence probe. Reaction conditions: terephthalic acid concentration:  $0.6 \text{ mM}$ ;  $\text{H}_2\text{O}_2$  concentration:  $0.4 \text{ M}$ ; reaction temperature:  $25 \text{ }^\circ\text{C}$ ; reaction time:  $12 \text{ h}$

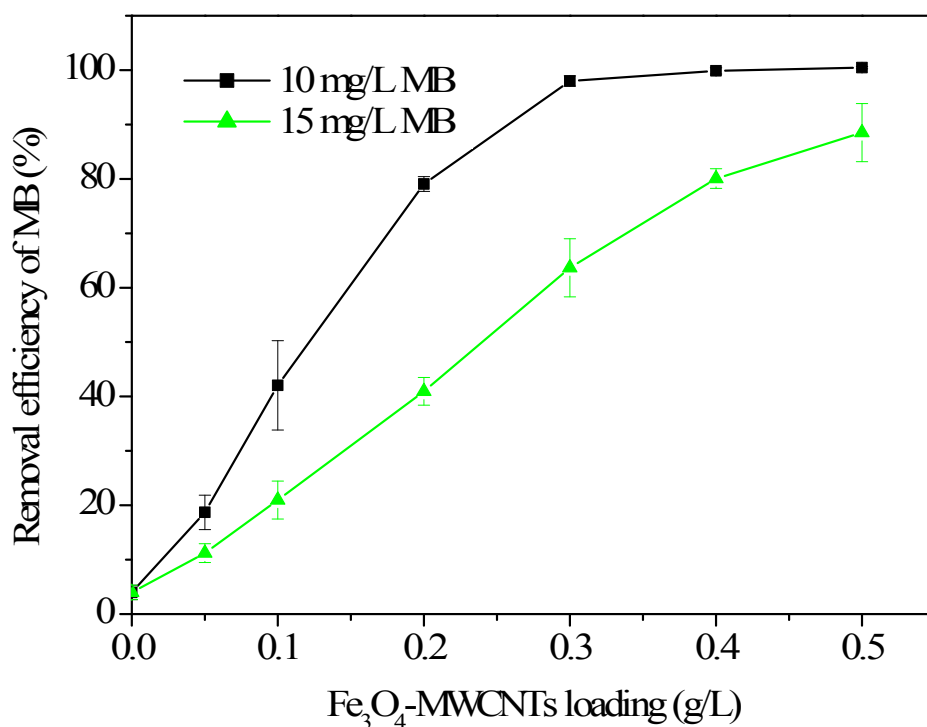

**Figure S5.** Effect of Fe<sub>3</sub>O<sub>4</sub>-MWCNTs loading on the removal of different concentrations of MB. Reaction conditions: pH 5.5, 0.4 M H<sub>2</sub>O<sub>2</sub>.

**Table S1.** Leaching of Fe after suspending 7.5 mg Fe<sub>3</sub>O<sub>4</sub>-MWCNTs in 25 mL water with different pH for 12 h. Numbers in parentheses represent relative standard deviation (n=2)

| pH                                                     | 1.0         | 2.0        | 3.0        | 4.0        | 5.0        | 6.0        |
|--------------------------------------------------------|-------------|------------|------------|------------|------------|------------|
| The released Fe <sup>3+</sup><br>(mg L <sup>-1</sup> ) | 4.78(0.10)  | 2.14(0.29) | 1.66(0.01) | 0.78(0.03) | 0.25(0.02) | 0.25(0.03) |
| The leaching rate of<br>Fe <sup>3+</sup> (%)           | 6.00 (0.13) | 2.69(0.36) | 2.08(0.01) | 0.97(0.04) | 0.31(0.02) | 0.31(0.03) |
